# Supplementary material for: DFT-aided experimental investigation on the electrochemical performance of hetero-interface-functionalized CuO nanoparticle-decorated MoS2 nanoflowers for energy storage applications
Source: Royal Society of Chemistry journal article supplement (doi:10.1039/d3ma00858d), 2024-01-01
Supplement: d3ma00858d1.pdf [file d3ma00858d1.pdf]

## DFT aided Experimental Investigation on the Electrochemical Performance of Hetero-Interface Functionalized CuO Nanoparticles Decorated MoS<sub>2</sub> Nanoflower for Energy Storage Applications

Muhammad Rakibul Islam<sup>1\*</sup>, Nahid Farzana<sup>2</sup>, Md. Rajbanul Akhond<sup>3</sup>, Mizanur Rahman<sup>2</sup>,  
Md Jahidul Islam<sup>3</sup>, Ishtiaque M Syed<sup>2</sup>

<sup>1</sup>Department of Physics, Bangladesh University of Engineering and Technology, Dhaka, Bangladesh

<sup>2</sup>Department of Physics, University of Dhaka, Dhaka, Bangladesh

<sup>3</sup>Department of Materials and Metallurgical Engineering, Bangladesh University of Engineering and Technology, Dhaka, Bangladesh

\*Corresponding Author: [rakibul@phy.but.ac.bd](mailto:rakibul@phy.but.ac.bd)

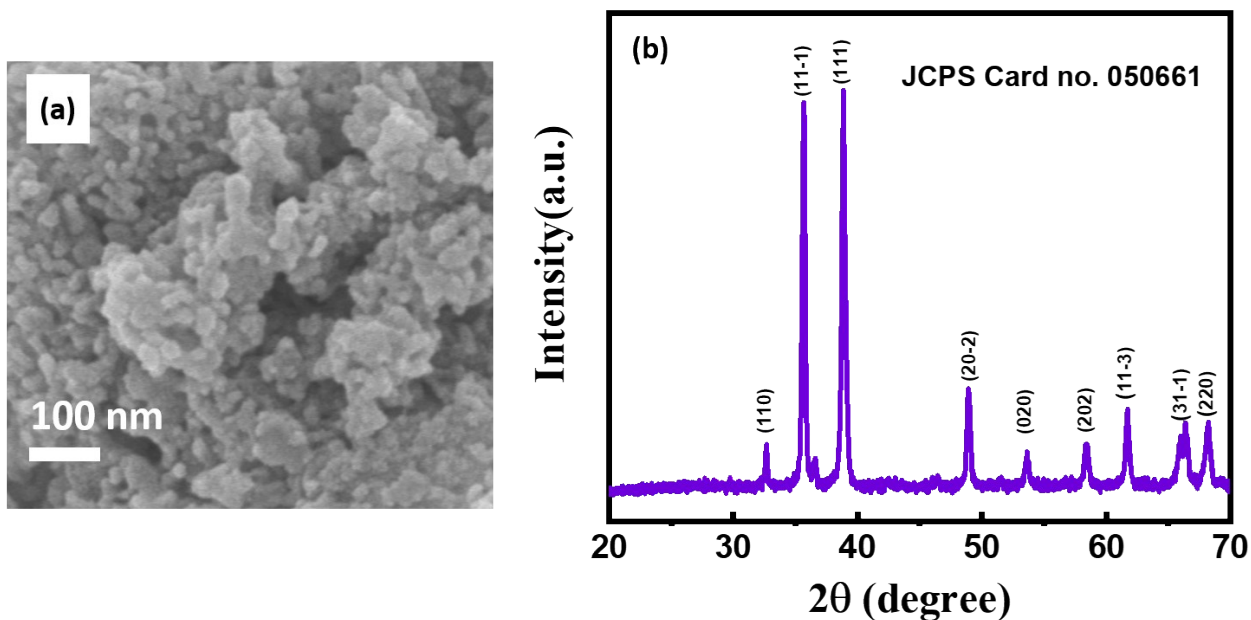

Figure. SF1. (a) FESEM images and (b) XRD pattern of CuO nanoparticle

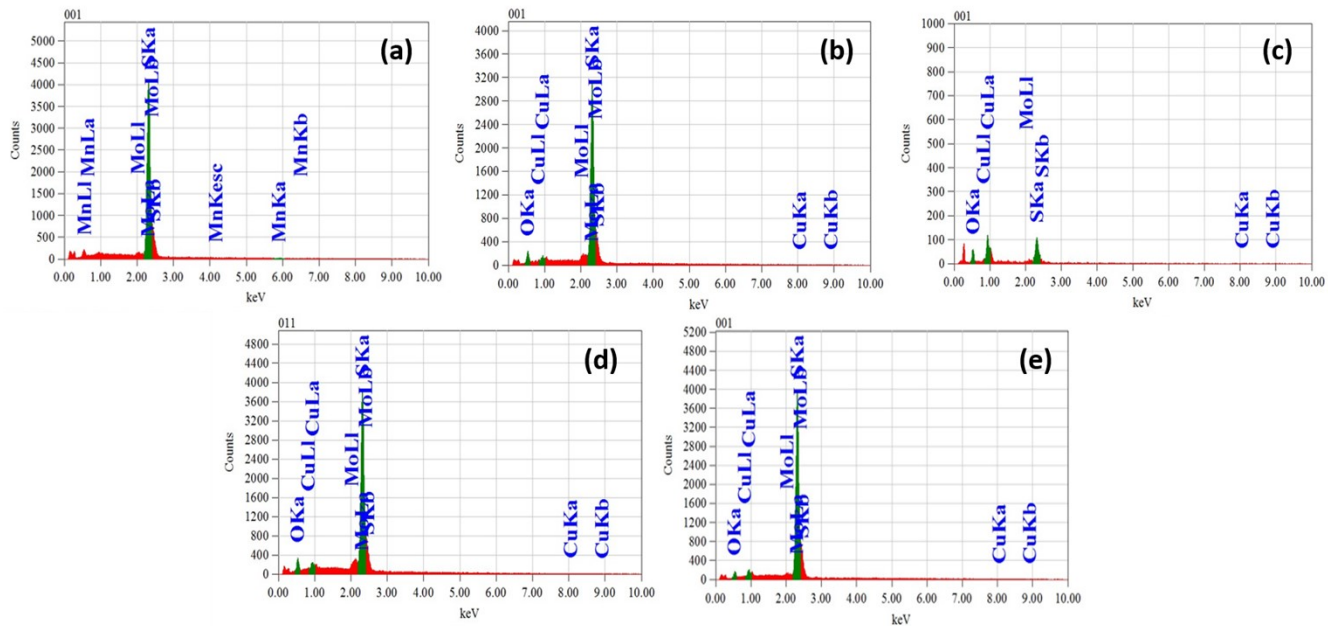

Figure. SF2. EDX spectrum of (a) MoS<sub>2</sub> (b) MoS<sub>2</sub>/CuO(1%) (c) MoS<sub>2</sub>/CuO(2%), (d) MoS<sub>2</sub>/CuO(4%), and (e) MoS<sub>2</sub>/CuO(6%).

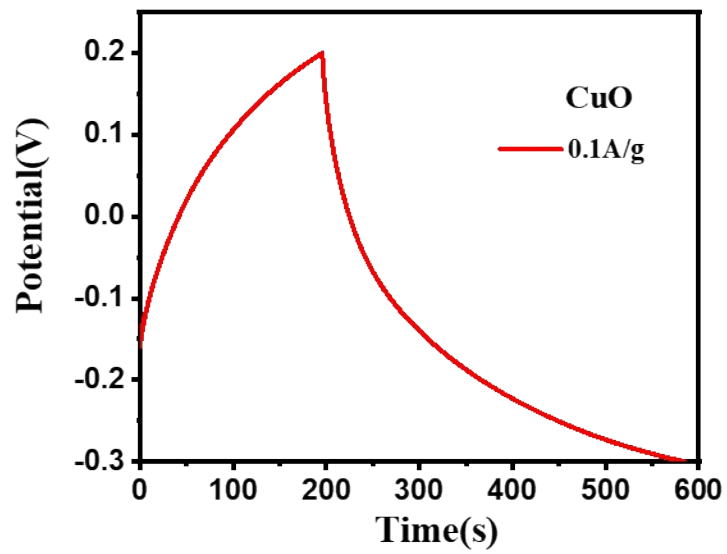

Figure. SF3. Galvanostatic charging-discharging curve of CuO nanoparticles.

Table. ST1. Compositional analysis of MoS<sub>2</sub>/CuO nanocomposite

| Sample                       | Elements | Weight % | Atomic % |
|------------------------------|----------|----------|----------|
| MoS <sub>2</sub>             | Mo       | 36.54    | 16.14    |
|                              | S        | 63.46    | 83.86    |
| MoS <sub>2</sub> /CuO (1wt%) | Mo       | 24.85    | 8.96     |
|                              | S        | 64.56    | 69.64    |
|                              | Cu       | 0.91     | 0.50     |
|                              | O        | 24.85    | 8.96     |
| MoS <sub>2</sub> /CuO (2wt%) | Mo       | 14.81    | 4.49     |
|                              | S        | 30.16    | 27.33    |
|                              | Cu       | 23.37    | 10.69    |
|                              | O        | 31.66    | 57.49    |
| MoS <sub>2</sub> /CuO (4wt%) | Mo       | 16.27    | 5.44     |
|                              | S        | 71.19    | 71.30    |
|                              | Cu       | 1.28     | 0.65     |
|                              | O        | 11.26    | 22.60    |
| MoS <sub>2</sub> /CuO (6wt%) | Mo       | 24.70    | 9.48     |
|                              | S        | 69.43    | 79.76    |
|                              | Cu       | 1.60     | 0.93     |
|                              | O        | 4.27     | 9.83     |
